# Supplementary material for: Assessing knowledge, attitudes and practices towards HPV vaccination among male healthcare professionals and students in Delhi National Capital Region: A mixed-method study
Source: Research Square preprint supplement (doi:10.21203/rs.3.rs-7975577/v1), 2025-12-12
Supplement: Supplementary file 1 [file 33a4cb352781570c1eaaae73.docx]

**Table 3. Distribution and association of the Knowledge scores of participants from the quantitative part**

**in relation to socio-demographic variables (n-299)**

|  |  | **Knowledge Based Questions** | | | | | | | | | | | | | | | | | | | | | |
| --- | --- | --- | --- | --- | --- | --- | --- | --- | --- | --- | --- | --- | --- | --- | --- | --- | --- | --- | --- | --- | --- | --- | --- |
| **S.no** | **Socio-demographic** | **What is HPV** | | **P- Value** | **HPV infection transmission** | | **P- Value** | **Diseases caused by HPV** | | **P- Value** | **HPV causing diseases in men** | | **P- Value** | **Men can be carriers for HPV infection** | | **P- Value** | **Gender-neutral HPV vaccine** | | **P- Value** | **Ideal age for getting HPV vaccine** | | | **P- Value** |
|  | **Variable** | **Yes** | **No** | **Yes** | **No** | **Yes** | **No** | **Yes** | **No** | **Yes** | **No** | **Yes** | **No** | **6-18 Yrs9** | **9-26 Yrs** | **26 Yrs and Above** |
|  |  | **N(%)** | **N(%)** | **N(%)** | **N(%)** | **N(%)** | **N(%)** | **N(%)** | **N(%)** | **N(%)** | **N(%)** | **N(%)** | **N(%)** |
| 1 | **Age** | | | | | | | | | | | | | | | | | | | | | | |
| 18-25 years | 164 (76.3%) | 51 (23.7%) |  | 211 (98.1%) | 4 (1.9%) |  | 203 (94.4%) | 12 (5.6%) |  | 191 (88.8%) | 24 (11.2%) |  | 161 (74.9%) | 54 (25.1%) |  | 112 (52.1%) | 103 (47.9%) |  | 48 (22.3%) | `107 (49.8%) | 34 (15.8%) |  |
|  |  |  |  |  |  |  |
|  |  |  |  |  |  |  |
| 26-35 years | 69 (97.2%) | 2 (2.8%) |  | 69 (97.2%) | 2 (2.8%) |  | 69 (97.2%) | 2 (22.8%) | 0.664 | 66 (93%) | 5 (7%) |  | 58 (81.7%) | 13 (18.3%) | 0.148 | 38 (53.5%) | 33 (46.5%) |  | 15 (21.1%) | 42 (59.2%) | 7 (9.9%) | 0.542 |
| 36-45 years | 9 (100%) | 0 (0%) |  | 9 (100%) | 0 (0%) | 0.913 | 9 (100%) | 0 (0%) |  | 9 (100%) | 0 (0%) |  | 9 (100%) | 0 (0%) |  | 7 (77.8%) | 2 (22.2%) |  | 1 (11.1%) | 5 (55.6%) | 2 (22.2%) |  |
| 46 and above | 4 (100%) | 0 (0%) | ***<0.001**** | 4 (100%) | 0 (0%) |  | 4 (100%) | 0 (0%) |  | 4 (100%) | 0 (0%) | 0.476 | 4 (100%) | 0 (0%) |  | 2 (50%) | 2 (50%) | 0.511 | 0 (0%) | 2 (50%) | 2 (50%) |  |
| 2 | **Occupation** | | | | | | | | | | | | | | | | | | | | | | |
| Government Job | 18 (100%) | 0 (0%) | ***0.027**** | 17 (94.4%) | 1 (5.6%) | 0.802 | 17 (94.4%) | 1 (5.6%) | 0.147 | 18 (100%) | 0 (0%) | 0.197 | 18 (100%) | 0 (0%) | 0.194 | 12 (66.7%) | 6 (33.3%) | 0.45 | 6 (33.3%) | 11 (61.1%) | 1 (5.6%) |  |
| Private Job | 37 (92.5%) | 3 (7.5%) | 39 (97.5%) | 1 (2.5%) | 39 (97.5%) | 1 (2.5%) | 35 (87.5%) | 5 (12.5%) | 32 (80%) | 8 (20%) | 23 (57.5%) | 17 (42.5%) | 5 (12.5%) | 26 (65%) | 1 (2.5%) | 0.085 |
| Self-employed | 15 (93.8%) | 1 (6.3%) | 16 (100%) | 0 (0%) |  | 16 (100%) | 0 (0%) |  | 16 (100%) | 0 (0%) |  | 12 (75%) | 4 (25%) |  | 6 (37.5%) | 10 (62.5%) |  | 3 (18.8%) | 9 (56.3%) | 2 (12.5%) |  |
| Student | 174 (78.4%) | 48 (21.6%) |  | 218 (98.2%) | 4 (1.8%) |  | 211 (95%) | 11 (5%) |  | 199 (89.6%) | 23 (10.4%) |  | 168 (75.7%) | 54 (24.3%) |  | 117 (52.7%) | 105 (47.3%) |  | 50 (22.5%) | 109 (49.1%) | 40 (18%) |  |
| Unemployed | 2 (66.7%) | 1 (33.3%) |  | 3 (100%) | 0 (0%) |  | 2 (66.7%) | 1 (33.3%) |  | 2 (66.7%) | 1 (33.3%) |  | 2 (66.7%) | 1 (33.3%) |  | 1 (33.3%) | 2 (66.7%) |  | 0 (0%) | 1 (33.3%) | 1 (33.3%) |  |
| 3 | **Education** | | | | | | | | | | | | | | | | | | | | | | |
| Graduate | 143 (78.6%) | 39 (21.4%) |  | 177 (97.3%) | 5 (2.7%) |  | 174 (95.6%) | 8 (4.4%) |  | 163 (89.6%) | 19 (10.4%) |  | 136 (74.7) | 46 (25.3%) |  | 95 (52.2%) | 87 (47.8%) |  | 40 (22%) | 88 (48.4%) | 33 (18.1%) |  |
|  |  |  |  |  |  |  |
|  |  | 0.769 | 0.634 |  |  |  |
| Post Graduate | 97 (88.2%) | 13 (11.8%) | 0.111 | 109 (99.1%) | 1 (0.9%) | 0.516 | 104 (94.5%) | 6 (5.5%) |  | 100 (90.9%) | 10 (9.1%) |  | 90 (81.8%) | 20 (18.2%) | 0.324 | 60 (54.5%) | 50 (45.5%) | 0.906 | 23 (20.9%) | 65 (59.1%) | 10 (9.1%) | 0.368 |
| Doctorate | 6 (85.7%) | 1 (14.3%) |  | 7 (100%) | 0 (0%) |  | 7 (100%) | 0 (0%) |  | 7 (100%) | 0 (0%) |  | 6 (85.7%) | 1 (14.3%) |  | 4 (57.1%) | 3 (42.9%) |  | 1 (14.3%) | 3 (42.9%) | 2 (28.6%) |  |
| 4 | **Marital status** | | | | | | | | | | | | | | | | | | | | | | |
| Married | 34 (89.5%) | 4 (10.5%) |  | 37 (97.4%) | 1 (2.6%) | 0.913 | 36 (94.7%) | 2 (5.3%) |  | 35 (92.1%) | 3 |  | 32 (84.2%) | 6 (15.8%) |  | 21 (55.3%) | 17 (44.7%) | 0.914 | 7 (18.4%) | 23 (60.5%) | 4 (10.5%) | 0.108 |
| 0.46 | 0.254 | (7.90%) | 0.688 | 0.568 |
| Unmarried | 208 (81.3%) | 48 (18.7%) |  | 251 (98%) | 5 (2%) | 245 (95.7%) | 11 (4.3%) |  | 231 (90.2%) | 25 (9.8%) |  | 196 (76.6%) | 60 (23.4%) |  | 135 (52.7%) | 121 (47.3%) | 57 (22.3%) | 132 (51.6%) | 38 (14.8%) |
| Other | 4 (80%) | 1 (20%) |  | 5 (100%) | 0 (0%) | 4 (80%) | 1 (20%) |  | 4 (80%) | 1 (20%) |  | 4 (80%) | 1 (20%) |  | 3 (60%) | 2 (40%) | 0 (0%) | 1 (20%) | 3 (60%) |

Significant variables- *****

The table illustrates the distribution and association of the knowledge scores regarding HPV vaccination pertaining to male health care workers in relation to socio-demographic variables

**Table 4. Distribution and association of the attitude scores of participants from the quantitative part in relation to socio-demographic variables (n-299)**

|  |  | **Attitude Based Questions** | | | | | | | | | | | | | | | | | | | | | | | |
| --- | --- | --- | --- | --- | --- | --- | --- | --- | --- | --- | --- | --- | --- | --- | --- | --- | --- | --- | --- | --- | --- | --- | --- | --- | --- |
|  | **Socio-demographic** | **HPV can cause serious diseases** | | **P- Value** | **HPV is related to penile/anal cancer** | | **P- Value** | **Sexually active should get vaccinated for HPV** | | **P- Value** | **HPV vaccine should be taken before first intercourse** | | **P- Value** | **Partner’s opinion is essential to get HPV vaccine** | | **P- Value** | **Willingness to get vaccinated against HPV** | | **P- Value** | **Willingness to know more about HPV and its vaccine** | | **P- Value** | **HPV vaccine should be part of immunization program** | | **P- Value** |
| **S.no** | **Variable** | **Yes** | **No** | **Yes** | **No** | **Yes** | **No** | **Yes** | **No** | **Yes** | **No** | **Yes** | **No** | **Yes** | **No** | **Yes** | **No** |
|  |  | **N(%)** | **N(%)** | **N(%)** | **N(%)** | **N(%)** | **N(%)** | **N(%)** | **N(%)** | **N(%)** | **N(%)** | **N(%)** | **N(%)** | **N(%)** | **N(%)** | **N(%)** | **N(%)** |
| 1 | **Age** | | | | | | | | | | | | | | | | | | | | | | | | |
| 18-25 years | 192 (89.3%) | 23 (10.7%) | 0.859 | 176 (81.9%) | 39 (18.1%) | 0.446 | 97 (45.1%) | 118 (54.9%) | 0.15 | 153 (71.2%) | 62 (28.8%) | 0.433 | 131 (60.9%) | 84 (39.1%) | 0.642 | 164 (76.3%) | 51 (23.7%) | ***0.001**** | 186 (86.5%) | 29 (13.5%) | 0.442 | 185 (86%) | 30 (14%) | 0.232 |
| 26-35 years | 65 (91.5%) | 6 (8.5%) | 61 (85.9%) | 10 (14.1%) | 27 (38%) | 44 (62%) | 55 (77.5%) | 16 (22.5%) | 38 (53.5%) | 33 (46.5%) | 65 (91.5%) | 6 (8.5%) | 66 (93%) | 5 (7%) | 66 (93%) | 5 (7%) |
| 36-45 years | 8 (88.9%) | 1 (11.1%) | 0 (0%) | 9 (100%) | 7 (77.8%) | 2 (22.2%) | 6 (66.7%) | 3 (33.3%) | 5 (55.6%) | 4 (44.4%) | 8 (88.9%) | 1 (11.1%) | 8 (88.9%) | 1 (11.1%) | 9 (100%) | 0 (0%) |
| 46 and above | 4 (100%) | 0 (0%) | 3 (75%) | 1 (25%) | 2 (50%) | 2 (50%) | 4 (100%) | 0 (0%) | 3 (75%) | 1 (25%) | 1 (25%) | 3 (75%) | 4 (100%) | 0 (0%) | 3 (75%) | 1 (25%) |
| 2 | **Occupation** | | | | | | | | | | | | | | | | | | | | | | | | |
| Government Job | 16 (88.9%) | 2 (11.1%) |  | 15 (83.3%) | 3 (16.7%) |  | 9 (50%) | 9 (50%) |  | 17 (94.4%) | 1 (5.6%) |  | 10 (55.6%) | 8 (44.4%) |  | 18 (100%) | 0 (0%) |  | 18 (100%) | 0 (0%) |  | 18 (100%) | 0 (0%) | 0.171 |
|  | 0.755 | 0.447 | ***0.013**** |  |  | 0.43 |
| Private Job | 37 (92.5%) | 3 (7.5%) |  | 33 (82.5%) | 7 (17.5%) |  | 15 (37.5%) | 25 (62.5%) |  | 35 (87.5%) | 5 (12.5%) |  | 21 (52.5%) | 19 (47.5%) | 0.713 | 33 (82.5%) | 7 (17.5%) |  | 35 (87.5%) | 5 (12.5%) |  | 38 (95%) | 2 (5%) |
| Self-employed | 15 (93.8%) | 1 (6.3%) |  | 15 (93.8%) | 1 (6.3%) |  | 8 (50%) | 8 (50%) |  | 12 (75%) | 4 (25%) |  | 9 (56.3%) | 7 (43.8%) |  | 13 (81.3%) | 3 (18.8%) | 0.217 | 14 (87.5%) | 2 (12.5%) |  | 14 (87.5%) | 2 (12.5%) |
| Student | 199 (89.6%) | 23 (10.4%) |  | 184 (82.9%) | 38 (17.1%) |  | 101 (45.5%) | 121 (54.5%) |  | 153 (68.9%) | 69 (31.1%) |  | 136 (61.3%) | 86 (38.7%) |  | 172 (77.5%) | 50 (22.5%) |  | 195 (87.8%) | 27 (12.2%) |  | 191 (86%) | 31 (14%) |
| Unemployed | 2 (66.7%) | 1 (33.3%) | 0.664 | 2 (66.7%) | 1 (33.3%) |  | 0 (0%) | 3 (100%) |  | 1 (33.3%) | 2 (66.7%) |  | 1 (33.3%) | 2 (66.7%) |  | 2 (66.7%) | 1 (33.3%) |  | 2 (66.7%) | 1 (33.3%) |  | 2 (66.7%) | 1 (33.3%) |
| 3 | **Education** | | | | | | | | | | | | | | | | | | | | | | | | |
| Graduate | 161 (88.5%) | 21 (11.5%) | 0.466 | 151 (83%) | 31 (17%) |  | 76 (41.8%) | 106 (58.2%) |  | 128 (70.3%) | 54 (29.7%) |  | 107 (58.8%) | 75 (41.2%) |  | 142 (78%) | 40 (22%) | 0.169 | 158 (86.8%) | 24 (13.2%) | 0.444 | 159 (87.4%) | 23 (12.6%) | 0.892 |
| Post Graduate | 102 (92.7%) | 8 (7.3%) | 94 (85.5%) | 16 (14.5%) |  | 54 (49.1%) | 56 (50.9%) |  | 83 (75.5%) | 27 (24.5%) | 0.167 | 63 (57.3%) | 47 (42.7%) |  | 92 (83.6%) | 18 (16.4%) | 99 (90%) | 11 (10%) | 98 (89.1%) | 12 (10.9%) |
| Doctorate | 6 (85.7%) | 1 (14.3%) | 4 (57.1% | 3 (42.9%) | 0.148 | 3 (42.9%) | 4 (57.1%) | 0.472 | 7 (100%) | 0 (0%) |  | 7 (100%) | 0 (0%) | 0.082 | 4 (57.1%) | 3 (42.9%) | 7 (100%) | 0 (0%) |  | 6 (85.7%) | 1 (14.3%) |
| 4 | **Marital status** | | | | | | | | | | | | | | | | | | | | | | | | |
| Married | 33 (86.8%) | 5 (13.2%) | 0.582 | 32 (84.2%) | 6 (15.8%) | 0.969 | 22 (57.9%) | 16 (42.1%) | 0.121 | 32 (84.2%) | 6 (15.8%) | 0.222 | 24 (63.2%) | 14 (36.8%) | 0.866 | 31 (81.6%) | 7 (18.4%) | 0.948 | 34 (89.5%) | 4 (10.5%) | 0.825 | 36 (94.7%) | 2 (5.3%) | 0.346 |
| Unmarried | 232 (90.6%) | 24 (9.4%) | 213 (83.2%) | 43 (16.8%) | 110 (43%) | 146 (57%) | 182 (71.1%) | 74 (28.9%) | 150 (58.6%) | 106 (41.4%) | 203 (79.3%) | 53. (20.7%) | 226 (88.3%) | 30 (11.7%) | 223 (87.1%) | 33 (12.9%) |
| Others | 4 (80%) | 1 (20%) | 4 (80%) | 1 (20%) | 1 (20%) | 4 (80%) | 4 (80%) | 1 (20%) | 3 (60%) | 2 (40%) | 4 (80%) | 1 (20%) | 4 (80%) | 1 (20%) | 4 (80%) | 1 (20%) |

Significant variables- *****

The table illustrates the distribution and association of the attitude scores regarding HPV vaccination pertaining to male health care workers in relation to socio-demographic variables

**Table 5. Distribution and association of the practice scores of participants from the quantitative part in relation to socio-demographic variables (n-299)**

|  |  | **Practice based questions** | | | | | | | | | | | | | | | | | |
| --- | --- | --- | --- | --- | --- | --- | --- | --- | --- | --- | --- | --- | --- | --- | --- | --- | --- | --- | --- |
|  | **Socio-demographic** | **Sexually Active** | | **P- Value** | **Indulge in safe sex practices** | | **P- Value** | **Educate young men/women about risk factors** | | **P- Value** | **Encourage young men to get vaccinated for HPV** | | **P- Value** | **Vaccinated for HPV** | | **P- Value** | **Willingness to create awareness about HPV among family/ friends** | | **P- Value** |
| **S.no** | **Variable** | **Yes** | **No** | **Yes** | **No** | **Yes** | **No** | **Yes** | **No** | **Yes** | **No** | **Yes** | **No** |
|  |  | **N(%)** | **N(%)** | **N(%)** | **N(%)** | **N(%)** | **N(%)** | **N(%)** | **N(%)** | **N(%)** | **N(%)** | **N(%)** | **N(%)** |
| 1 | **Age** | | | | | | | | | | | | | | | | | | |
| 18-25 years | 102 (47.4%) | 113 (52.6%) | ***<0.001**** | 141 (65.6%) | 74 (34.4%) | ***0.006**** | 146 (67.9%) | 69 (32.1%) | 0.441 | 177 (82.3%) | 38 (17.7%) | ***<0.001**** | 26 (12.1%) | 189 (87.9%) | 0.694 | **195 (90.7%)** | **20 (9.3%)** | 0.146 |
| 26-35 years | 54 (76.1%) | 17 (23.9%) | 58 (81.7%) | 13 (18.3%) | 50 (70.4%) | 21 (29.6%) | 67 (94.4%) | 4 (5.6%) | 6 (8.5%) | 65 (91.5%) | 70 (98.6%) | 1 (1.4%) |
| 36-45 years | 8 (88.9%) | 1 (11.1%) | 9 (100%) | 0 (0%) | 5 (55.6%) | 4 (44.4) | 3 (33.3%) | 6 (66.7%) | 1 (11.1%) | 8 (88.9%) | 8 (88.9%) | 1 (11.1%) |
| 46 and above | 3 (75%) | 1 (25%) | 4 (100%) | 0 (0%) | 4 (100%) | 0 (0%) | 4 (100%) | 0 (0%) | 1 (25%) | 3 (75%) | 4 (100%) | 0 (0%) |
| 2 | **Occupation** | | | | | | | | | | | | | | | | | | |
| Government Job | 15 (83.3%) | 3 (16.7%) | ***<0.001**** | 16 (88.9%) | 2 (11.1%) | ***0.004**** | 11 (61.1%) | 7 (38.9%) | 0.178 | 15 (83.3%) | 3 (16.7%) | 0.498 | 1 (5.6%) | 17 (94.4%) | 0.404 | 18 (100%) | 0 (0%) | 0.094 |
| Private Job | 30 (75%) | 10 (25%) | 34 (85%) | 6 (15%) | 31 (77.5%) | 9 (22.5%) | 37 (92.5%) | 3 (7.5%) | 7 (17.5%) | 33 (82.5%) | 39 (97.5%) | 1 (2.5%) |
| Self-employed | 14 (87.5%) | 2 (12.5%) | 12 (75%) | 4 (25%) | 8 (50%) | 8 (50%) | 14 (87.5%) | 2 (12.5%) | 1 (6.3%) | 15 (93.8%) | 16 (100%) | 0 (0%) |
| Student | 108 (48.6%) | 114 (51.4%) | 150 (67.6%) | 72 (32.4%) | 154 (69.4%) | 68 (30.6%) | 183 (82.4%) | 39 (17.6%) | 24 (10.8%) | 198 (89.2%) | 202 (91%) | 20 (9%) |
| Unemployed | 0 (0%) | 3 (100%) | 0 (0%) | 3 (100%) | 1 (33.3%) | 2 (66.7%) | 2 (66.7%) | 1 (33.3%) | 1 (33.3%) | 2 (66.7%) | 2 (66.7%) | 1 (33.3%) |
| 3 | **Education** | | | | | | | | | | | | | | | | | | |
| Graduate | 92 (50.5%) | 90 (49.5%) |  | 115 (63.2%) | 67 (36.8%) |  | 129 (70.9%) | 53 (29.1%) |  | 146 (80.2%) | 36 (19.8%) |  | 25 (13.7%) | 157 (86.3%) |  | 167 (91.8%) | 15 (8.2%) |  |
| Post Graduate | 71 (64.5%) | 39 (35.5%) |  | 90 (81.8%) | 20 (18.2%) |  | 70 (63.6%) | 40 (36.4%) | 0.266 | 98 (89.1%) | 12 (10.9%) |  | 8 (7.3%) | 102 (92.7%) |  | 103 (93.6%) | 7 (6.4%) |  |
| Doctorate | 4 (57.1%) | 3 (42.9%) | 0.065 | 7 (100%) | 0 (0%) | ***0.001**** | 6 (85.7%) | 1 (14.3%) |  | 7 (100%) | 0 (0%) | 0.068 | 1 (14.3%) | 6 (85.7%) | 0.234 | 7 (100%) | 0 (0%) | 0.63 |
| 4 | **Marital status** | | | | | | | | | | | | | | | | | | |
| Married | 35 (92.1%) | 3 (7.9%) | ***<0.001**** | 35 (92.1%) | 3 (7.9%) | ***0.003**** | 26 (68.4%) | 12 (31.6%) | 0.857 | 31 (81.6%) | 7 (18.4%) | 0.882 | 3 (7.9%) | 35 (92.1%) |  | 37 (97.4%) | 1 (2.6%) | ***<0.001**** |
| Unmarried | 130 (50.8%) | 126 (49.2%) | 175 (68.4%) | 81 (31.6%) | 175 (68.4%) | 81 (31.6%) | 216 (84.4%) | 40 (115.6%) | 30 (11.7%) | 226 (88.3%) | 0.652 | 238 (93%) | 18 (7%) |
| Others | 2 (40%) | 3 (60%) | 2 (40%) | 3 (60%) | 4 (80%) | 1 (20%) | 4 (80%) | 1 (20%) | 1 (20%) | 4 (80%) |  | 2 (40%) | 3 (60%) |

Significant variables- *****

The table illustrates the distribution and association of the Practice scores regarding HPV vaccination pertaining to male health care workers in relation to socio-demographic variable
